# Supplementary material for: Solvent-assisted, accelerated photobleaching and fluorescence recovery of conjugated polymer film
Source: Royal Society of Chemistry journal article supplement (doi:10.1039/c0cc04512h), 2010-11-29
Supplement: c0cc04512h.pdf [file c0cc04512h.pdf]

## Supporting information

### Solvent-Assisted, Accelerated Photobleaching, and Fluorescence Recovery of Conjugated Polymer Film

Wang-Eun Lee, Hyosang Park, Giseop Kwak\*

*Department of Polymer Science, Kyungpook National University, 1370 Sankyuk-dong, Buk-ku, Daegu 702-701, Korea*

\* Author to whom correspondence should be addressed: Tel.: +82-53-950-7558; fax: +82-53-950-6623; e-mail address: gkwak@knu.ac.kr

#### **Experimental Methods**

##### **1) Materials:**

The PTMSDPA was donated from NOF Co. Ltd., Japan and used as received. The synthetic method was well described in previous papers (ref. 9 in the paper). The polymer used in this study has high weight-average molecular weights ( $M_w$ ) of  $5.23 \times 10^6$  and polydispersity index ( $PDI = M_w/M_n$ ) of 3.2. The MEH-PPV ( $M_w$ :  $1.5\sim 2.5 \times 10^5$ ;  $PDI$ : 5.0) was purchased from Sigma-Aldrich and used as received. The all alcohols, hexane, 1,4-dioxane, and acrylonitrile used in this study were purchased as spectrophotometric grade with purity over 99% from Sigma-Aldrich or TCI.

##### **2) Preparation of thin polymer film:**

PTMSDPA polymer was dissolved in toluene (concentration 1.0 wt%) to prepare thin films on glass slides (Matsunami) with thickness of 500 nm by using spin-casting method (Mikasa 1H-D7 spin coater, 800 rpm).

##### **3) Photobleaching:**

The 500-nm-thick PTMSDPA films prepared by spin-casting method were used for photobleaching. The polymer films were swollen by immersing them in various solvents. The pristine or swelled films were exposed to 365-nm UV light condensed by

an object lens from a super-high-pressure 100-W Hg lamp (OSRAM, HBO103W/2). The irradiation power was controlled using several neutral-density (ND) filters and was monitored by UV-light meter (Lutron, YK-34UV).

#### **4) Measurements:**

The weight-average molecular weight ( $M_w$ ) and number-average molecular weight ( $M_n$ ) of PTMSDPA were evaluated using gel permeation chromatography (GPC, Shimadzu A10 instruments, Polymer Laboratories, PLgel Mixed-B (300 mm in length) as a column, and HPLC-grade tetrahydrofuran as eluent at 40 °C), based on a calibration with polystyrene standards. The time-resolved fluorescence emission spectra and the integral fluorescence intensity of PTMSDPA films were recorded with excitation wavelength of 365 nm at a scanning rate of 10 dots/sec at room temperature using Ocean Optics HR4000 UV-NIR high-resolution spectrofluorometer attached to a Nikon Eclipse E400 fluorescence microscope equipped with the super-high-pressure 100-W Hg lamp (OSRAM, HBO103W/2). The fluorescence intensities of the PTMSDPA film were collected at 520 nm. Fluorescence emission spectra of PTMSDPA were recorded on *JASCO* ETC-273 spectrofluorometer with excitation wavelength of 420 nm at a scanning rate of 500 nm/min at room temperature (excitation light source: Xenon lamp; excitation light power: 1.73  $\mu\text{W}/\text{cm}^2$ ). The FT-IR spectra were recorded on *JASCO* 620 spectrometer. The electrochemical study of PTMSDPA film was performed using by AC-2 photoelectron spectroscopy (Hitachi High Tech, Japan).

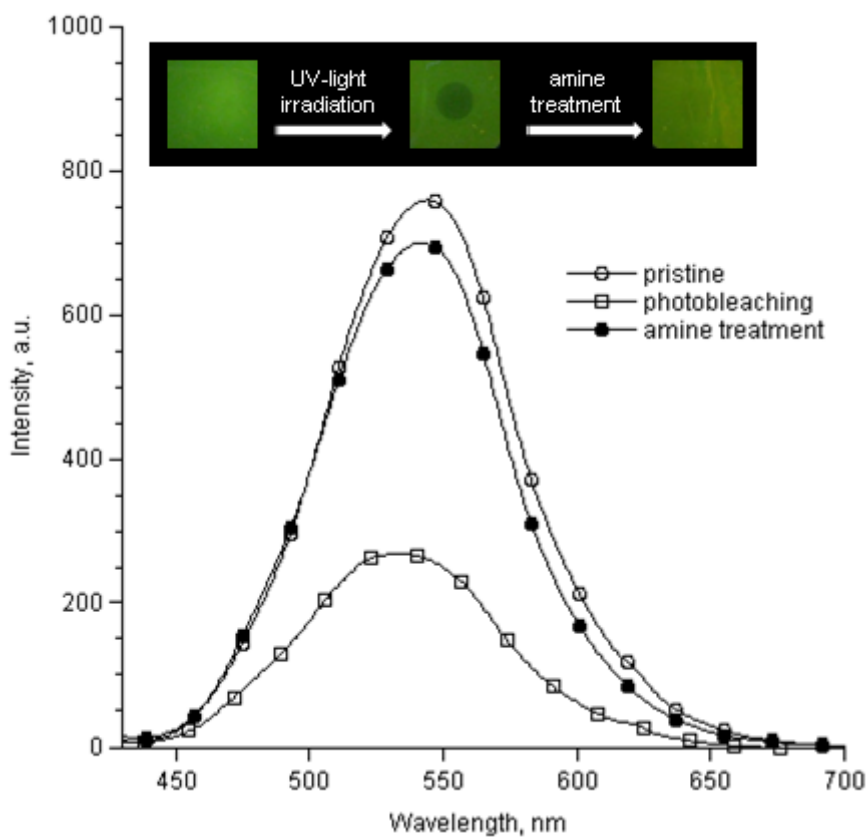

**Figure S1.** FL emission spectra of PTMSDPA film (film thickness  $\approx 500$  nm; excited at 420 nm). ( $\circ$ ) in pristine film; ( $\square$ ) after UV light irradiation with a power of  $1.73$   $\text{mW}/\text{cm}^2$  at a swollen state in methanol and subsequent drying in air; ( $\bullet$ ) after contacting to triethylamine liquid and subsequent drying. Inset: digital photographs (the dark circle in the film is FL-quenched part; excited at 365 nm)
